# Supplementary material for: DNA/protein binding, DNA cleavage, cytotoxicity, superoxide radical scavenging and molecular docking studies of copper(ii) complexes containing N-benzyl-N′-aryl-N′′-benzoylguanidine ligands
Source: Royal Society of Chemistry journal article supplement (doi:10.1039/c4qi00234b), 2015-01-01
Supplement: c4qi00234b1.pdf [file c4qi00234b1.pdf]

## DNA/protein binding, cytotoxicity, superoxide radical scavenging and molecular docking studies of copper(II) complexes containing *N*-benzyl-*N'*-aryl-*N''*-benzoylguanidine ligands

Kumaramangalam Jeyalakshmi,<sup>a</sup> Yuvaraj Arun,<sup>b</sup> Nattamai S. P. Bhuvanesh,<sup>c</sup>

Paramasivan Thirumalai Perumal,<sup>b</sup> Anantharaman Sreekanth<sup>a</sup> and Ramasamy Karvembu<sup>a\*</sup>

### Supplementary Information

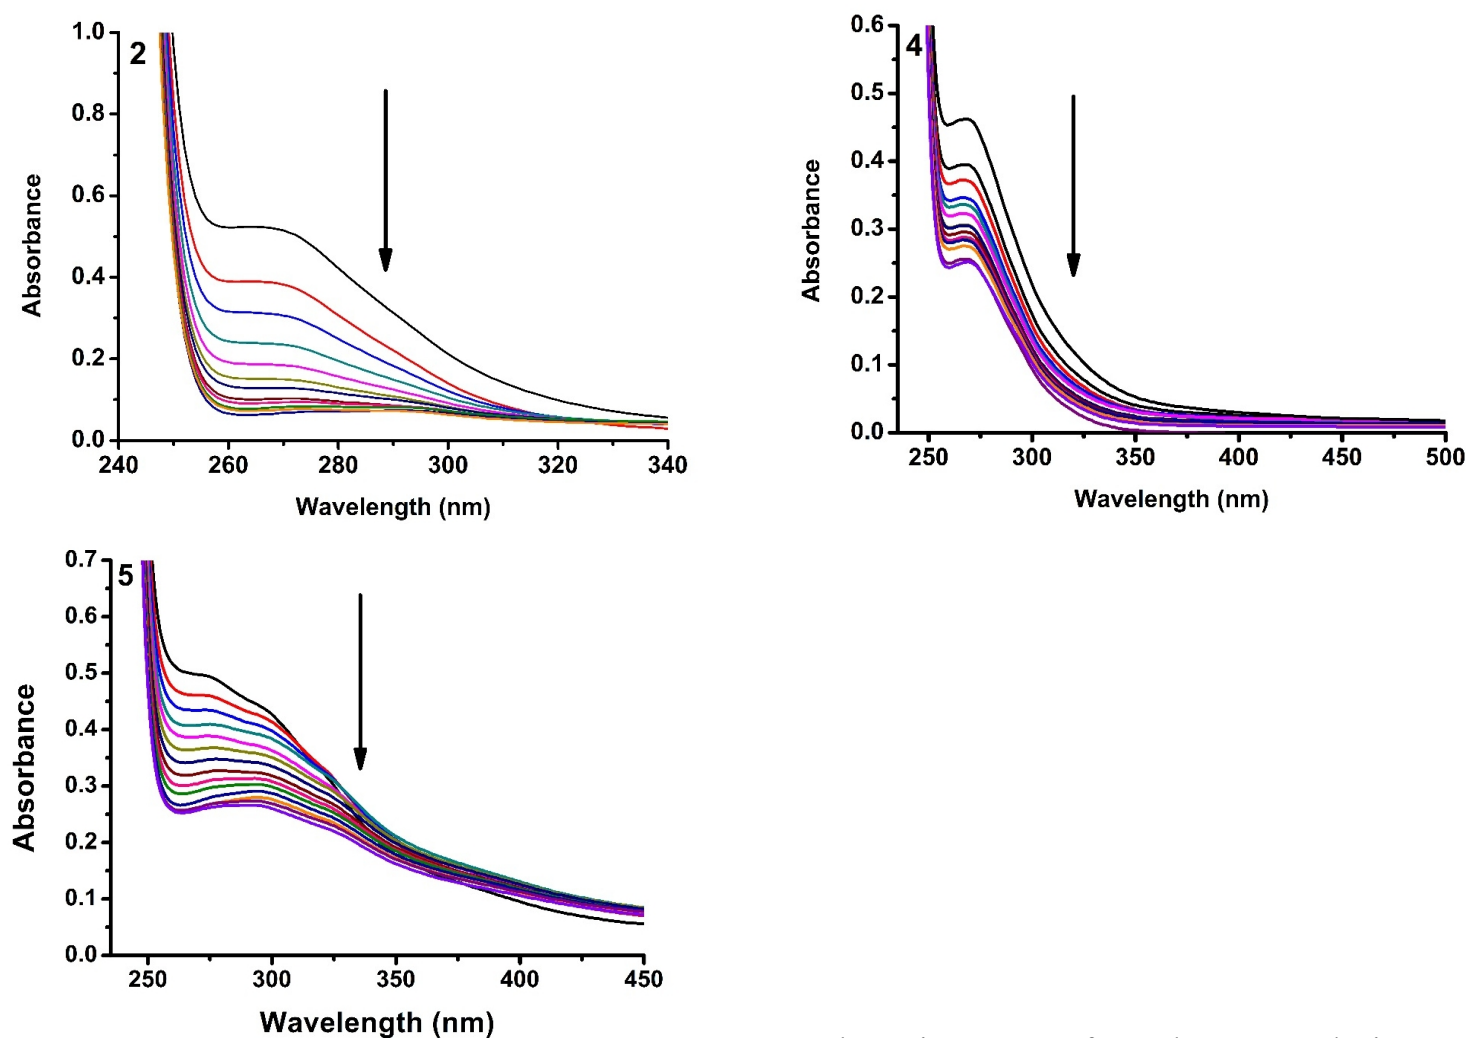

**Fig. S1** Absorption spectra of complexes **2**, **4** and **5** in Tris-HCl buffer upon addition of CT DNA. [Complex] =  $2.0 \times 10^{-5}$  M, [DNA] = 0-40  $\mu$ M. Arrow shows that the absorption intensities decrease upon increasing DNA concentration.

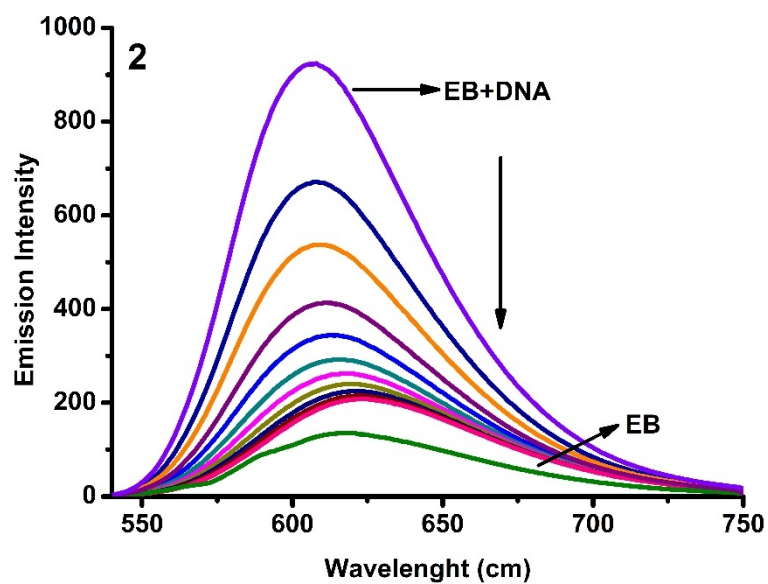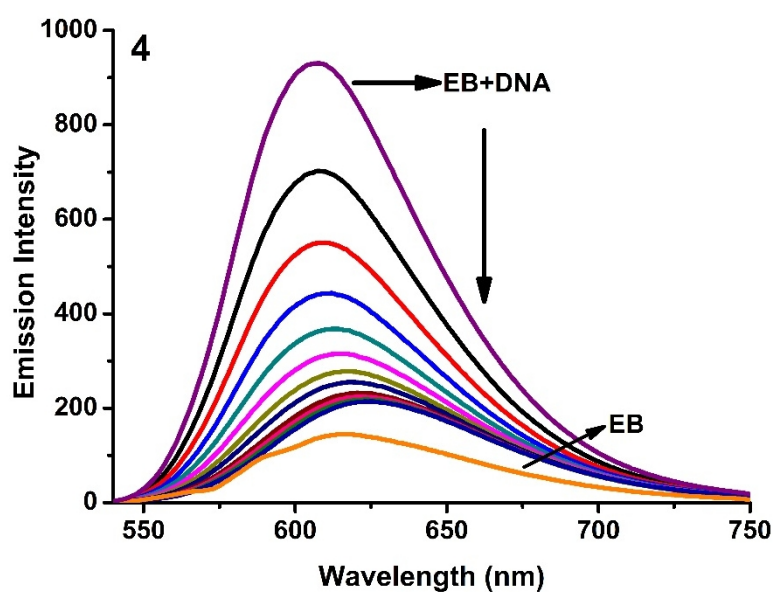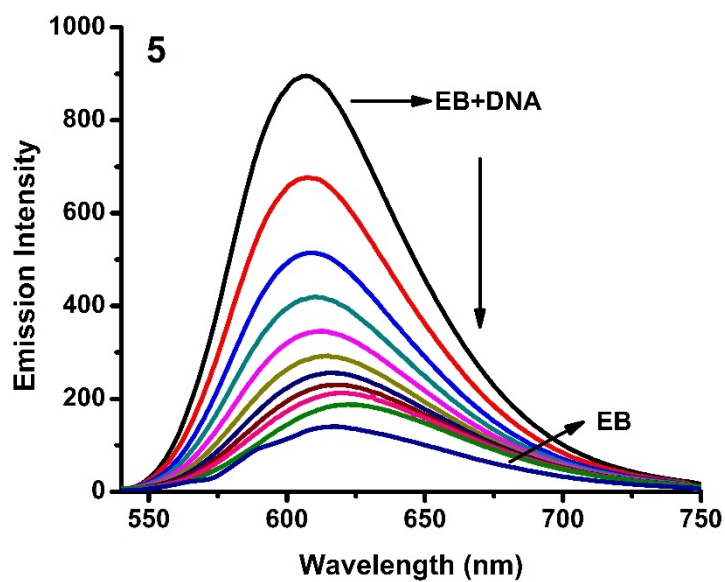

**Fig. S2** Fluorescence quenching curves of EB bound to DNA in the presence of **2**, **4** and **3**.  
 $[DNA] = 5 \mu M$ ,  $[EB] = 5 \mu M$  and  $[complex] = 0-25 \mu M$ .

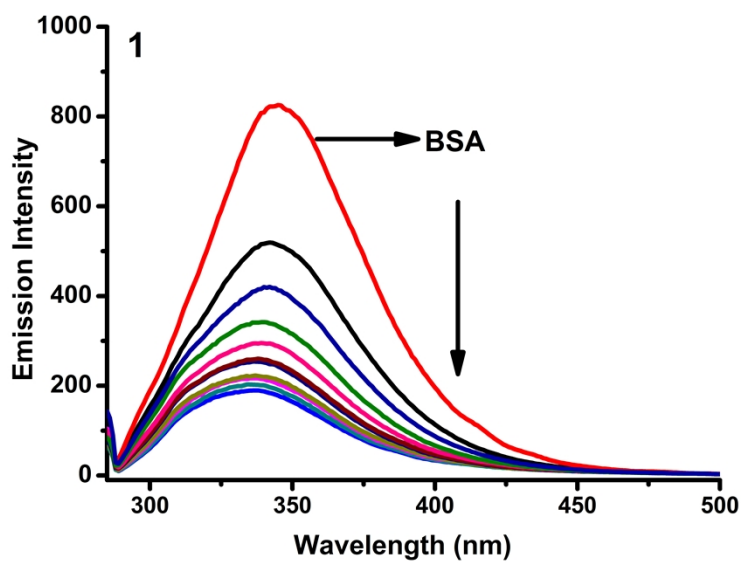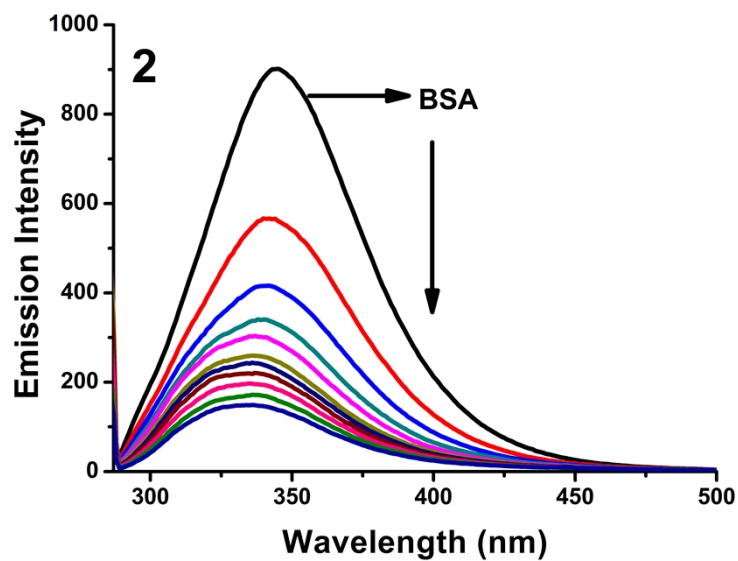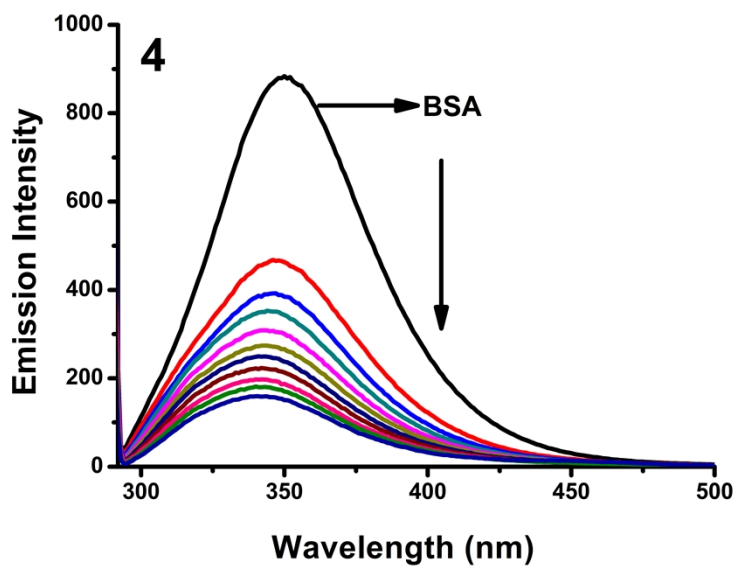

**Fig. S3** Fluorescence quenching curves of BSA in the absence and presence of **1**, **2** and **4**.  
[BSA] = 1  $\mu$ M and [complex] = 0-20  $\mu$ M.

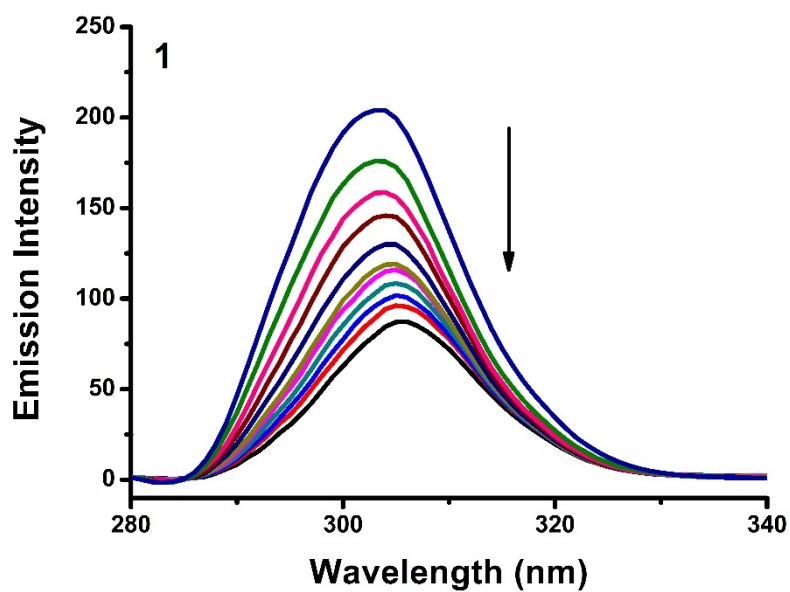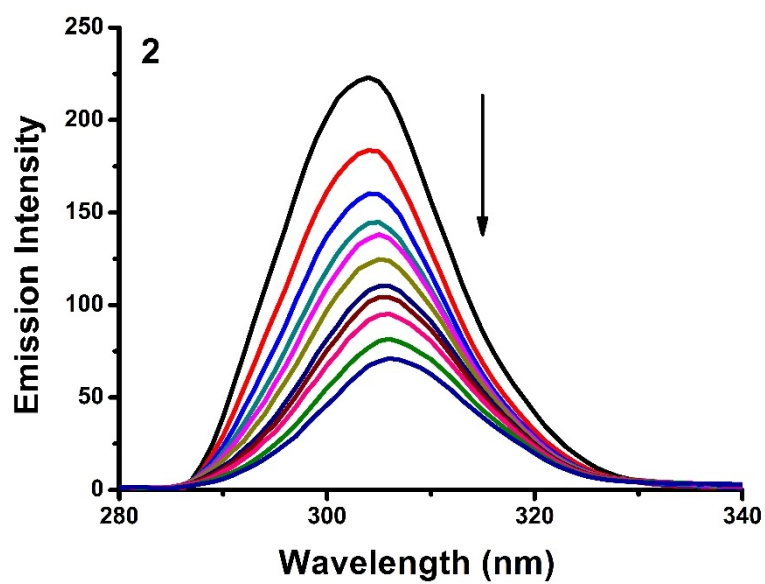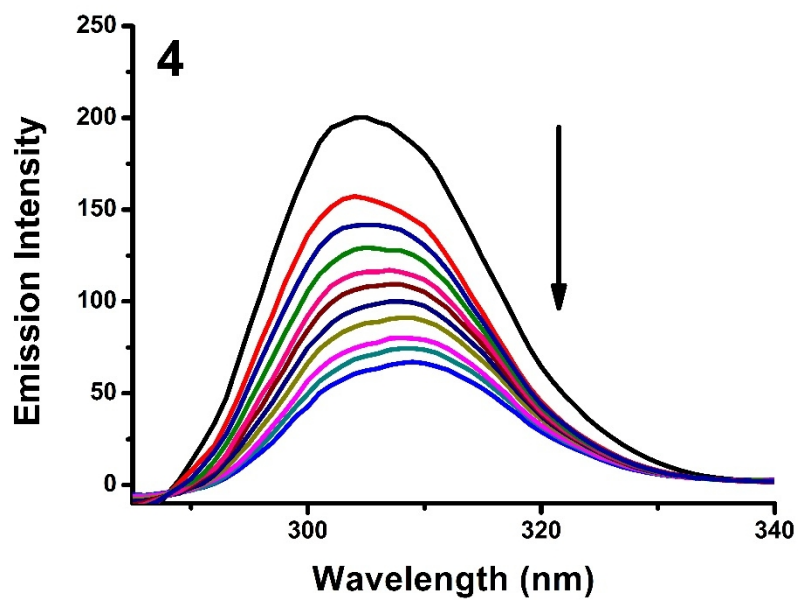

**Fig. S4** Synchronous spectra of BSA (1  $\mu\text{M}$ ) as a function of concentration of **1**, **2** and **4** (0-20  $\mu\text{M}$ ) with  $\Delta\lambda = 15$  nm.

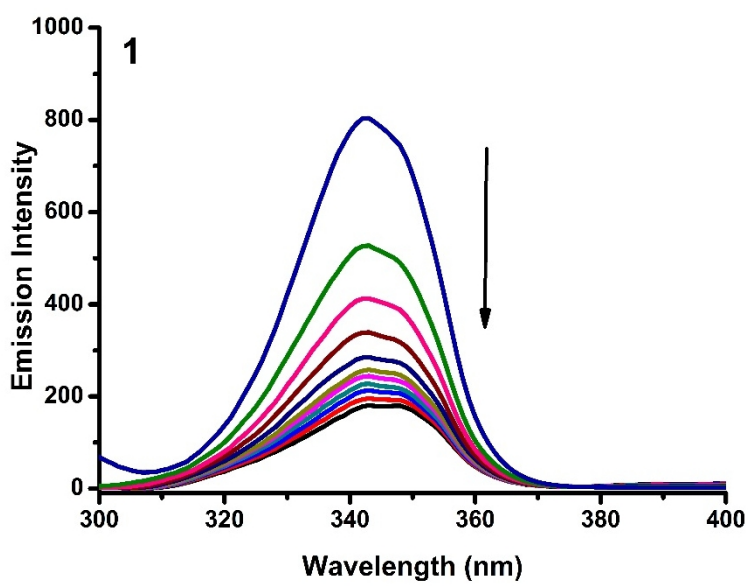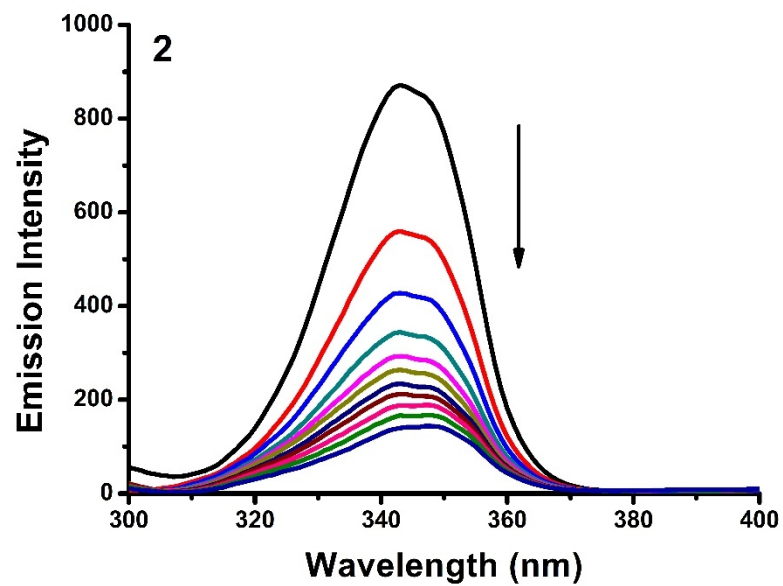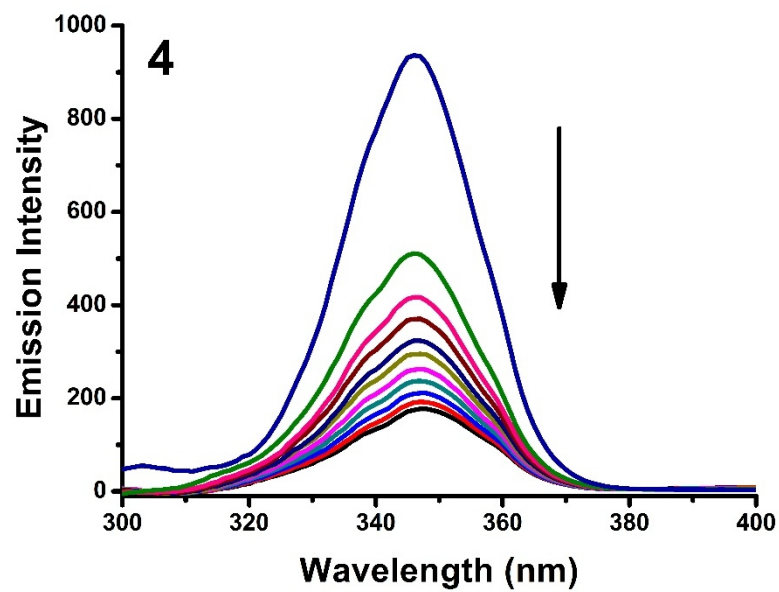

**Fig. S5** Synchronous spectra of BSA (1  $\mu\text{M}$ ) as a function of concentration of **1**, **2** and **4** (0-20  $\mu\text{M}$ ) with  $\Delta\lambda = 60$  nm.

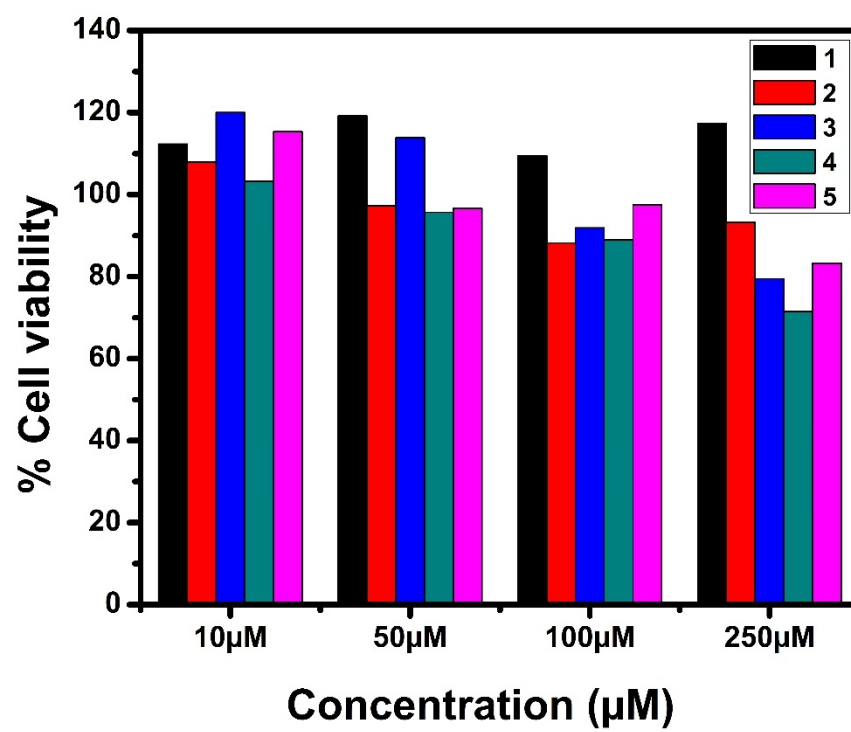

**Fig. S6** Cytotoxicity of complexes 1-5 after 24 h incubation on normal 3T3 cell lines.
